# Supplementary material for: Characterisation of δ 13 CH 4 source signatures from methane sourcesin Germany using mobile measurements
Source: Copernicus journal article supplement (doi:10.5194/amt-2018-259), 2018-10-01
Supplement: Supplementary file 1 [file amt-2018-259-supplement.pdf]

## 1 Supplement

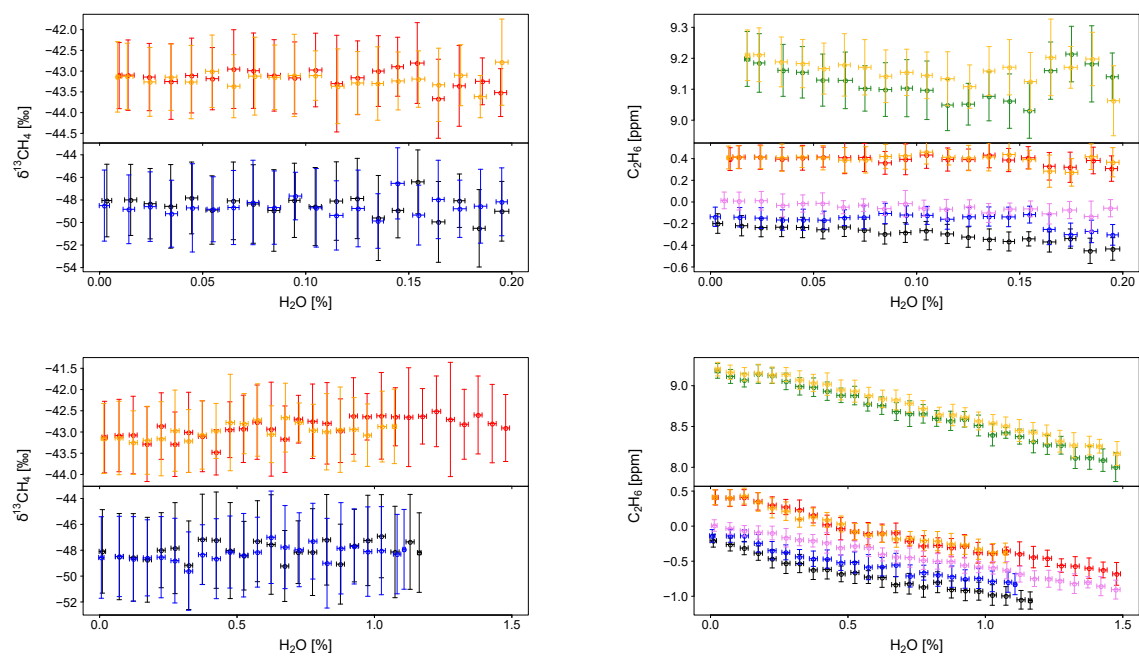

**Figure S1.** H<sub>2</sub>O interference on  $\delta^{13}\text{CH}_4$  and  $\text{C}_2\text{H}_6$ . Different colours indicate different tests and in part different gas cylinders used.

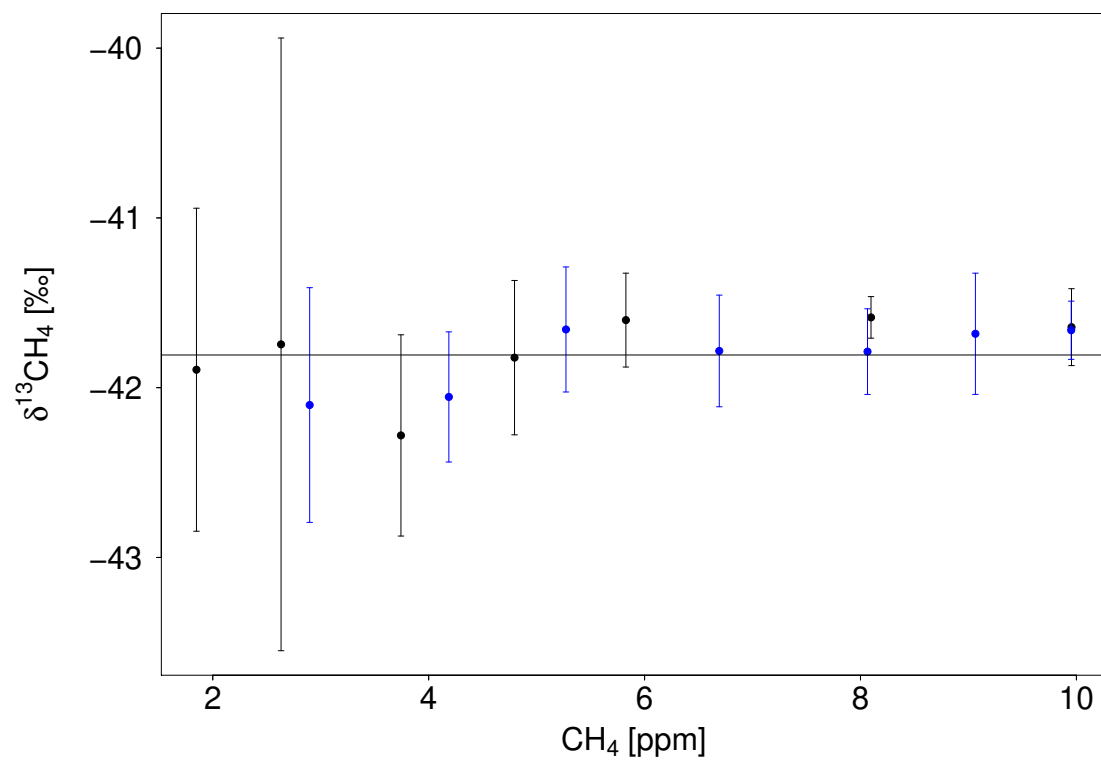

**Figure S2.** CH<sub>4</sub> interference on δ<sup>13</sup>CH<sub>4</sub>. The points show the 15 min average measurement of different gas mixtures prepared by two dilution tests (blue and black) with natural air (N<sub>2</sub>, O<sub>2</sub> and Ar) and dry compressed air of 10 ppm CH<sub>4</sub> (in N<sub>2</sub>, O<sub>2</sub> and Ar).

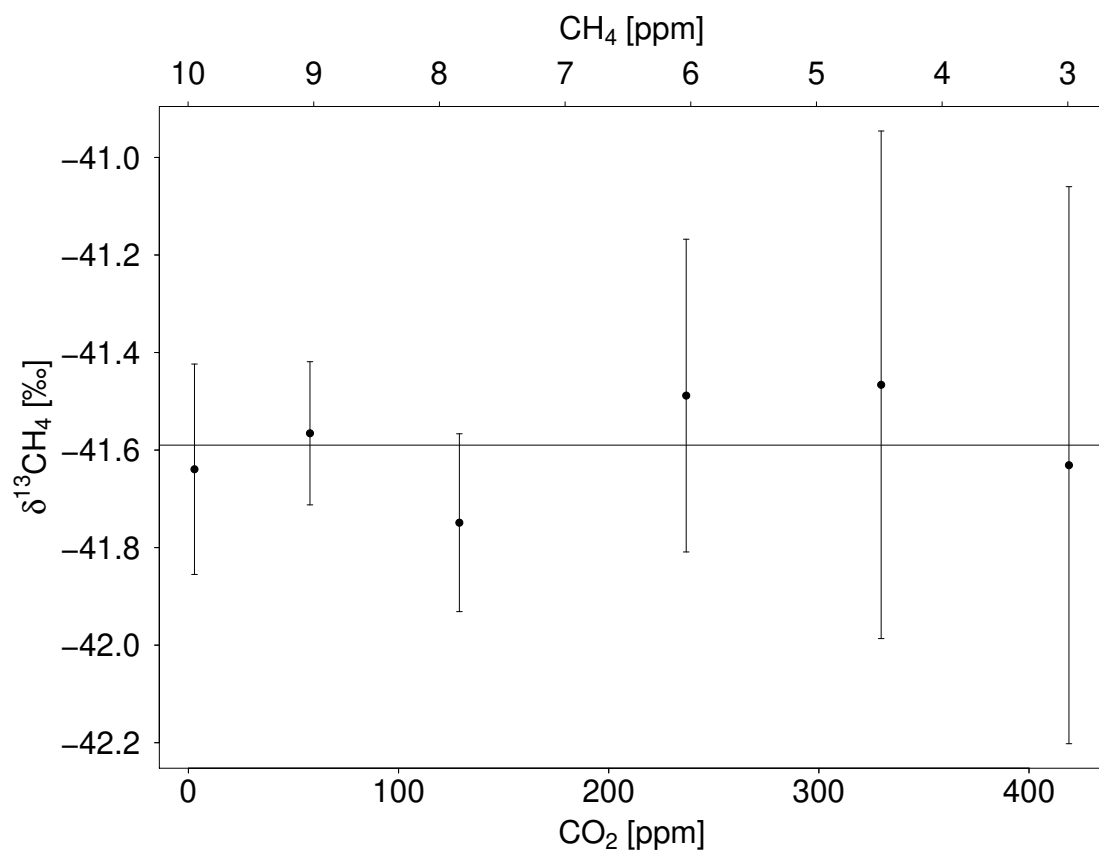

**Figure S3.** CO<sub>2</sub> interference on  $\delta^{13}\text{CH}_4$ . The points show the 15 min average measurement of different gas mixtures prepared by a dilution test with dry compressed air of 10ppm CH<sub>4</sub> (in N<sub>2</sub>, O<sub>2</sub> and Ar) and dry compressed air of 600ppm CO<sub>2</sub> (in N<sub>2</sub>, O<sub>2</sub> and Ar).

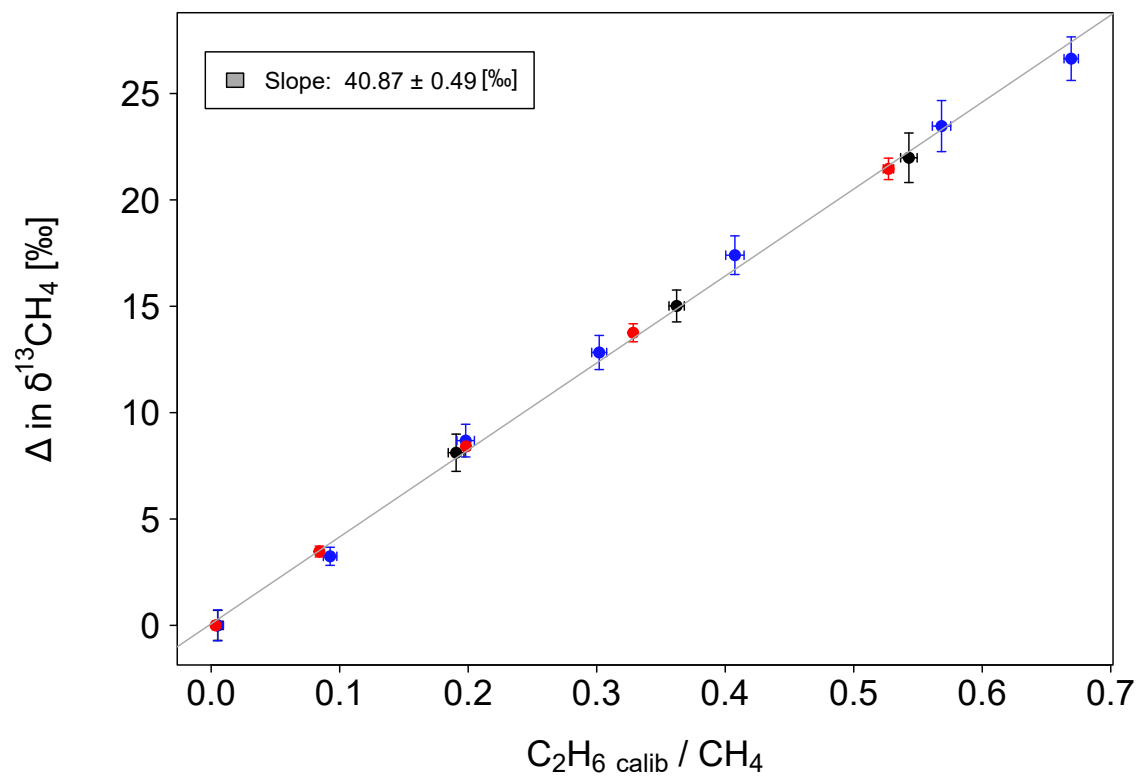

**Figure S4.**  $C_2H_6$  interference on  $\delta^{13}C_{CH_4}$ . The points show the corrected and calibrated 15 min average of different gas mixtures prepared by three dilution test with dry compressed air of 5 ppm  $C_2H_6$  (in  $N_2$ ,  $O_2$  and Ar) and dry compressed air of 10 ppm  $CH_4$  (in  $N_2$ ,  $O_2$  and Ar, red) or atmospheric concentrations (black and blue).

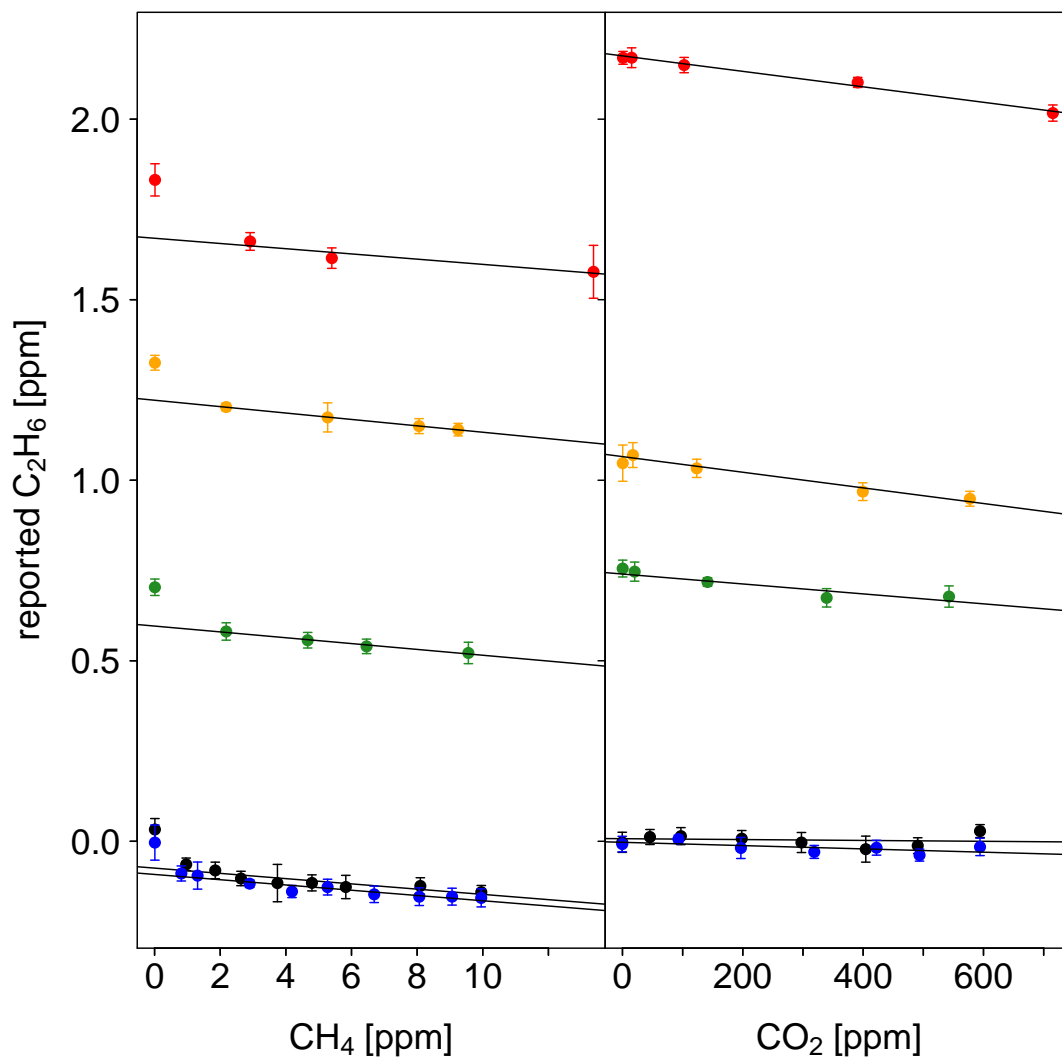

**Figure S5.**  $CH_4$  and  $CO_2$  interference on  $C_2H_6$ . The points show the reported 10–15 min average of different gas mixture. The blue and black points belong to four dilution test with natural air ( $N_2$ ,  $O_2$  and Ar) and dry compressed air of 10 ppm  $CH_4$  (in  $N_2$ ,  $O_2$  and Ar, red) or 600 ppm  $CO_2$  (in  $N_2$ ,  $O_2$  and Ar). The red, yellow and green measurements belong to injection tests at which different amounts of pure  $CH_4$  or  $CO_2$  were injected into three liter sample bags filled with natural air ( $N_2$ ,  $O_2$  and Ar) and different amounts of  $C_2H_6$ .

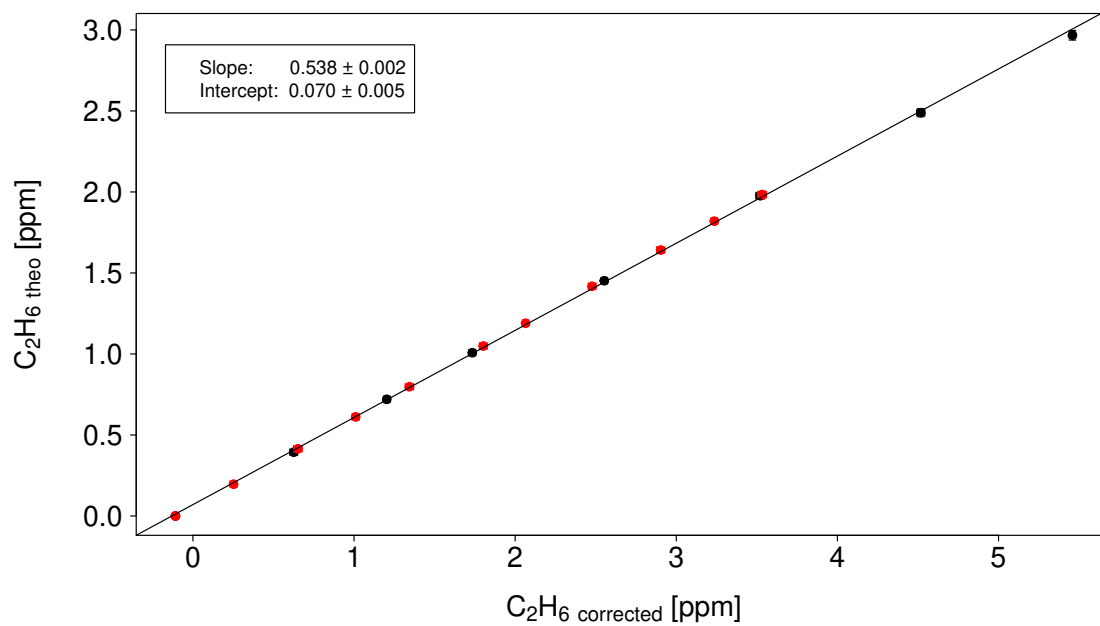

**Figure S6.** Linearity test of  $C_2H_6$ . The points (black and red) show the corrected 10–15 min average of different gas mixture prepared by two dilution tests with dry compressed air of atmospheric concentrations and dry compressed air of 5 ppm  $C_2H_6$  (in  $N_2$ ,  $O_2$  and Ar). The theoretical  $C_2H_6$  concentrations were calculated using the measured  $CH_4$  and  $CO_2$  concentrations in the gas mixture and the known  $CO_2$ ,  $CH_4$  and  $C_2H_6$  concentrations of the used gas cylinders.

**Table S1.**  $\delta^{13}\text{CH}_4$  signatures determined for each AirCore measurement.

| location                            | date       | $\delta^{13}\text{CH}_4$ [‰] | $r^2$ | max $\text{CH}_4$ |
|-------------------------------------|------------|------------------------------|-------|-------------------|
| <b>biogas plant</b>                 |            |                              |       |                   |
| Heidelberg                          | 2016-08-29 | $-62.69 \pm 1.05$            | 0.939 | 4.80              |
|                                     | 2016-09-08 | $-62.04 \pm 0.20$            | 0.999 | 11.55             |
|                                     | 2016-09-08 | $-61.23 \pm 0.60$            | 0.994 | 7.54              |
|                                     | 2016-09-28 | $-58.96 \pm 0.57$            | 0.992 | 14.09             |
|                                     | 2016-09-28 | $-61.89 \pm 0.32$            | 0.997 | 9.60              |
|                                     | 2016-09-28 | $-59.81 \pm 1.03$            | 0.959 | 4.52              |
|                                     | 2016-10-10 | $-64.16 \pm 0.44$            | 0.996 | 9.80              |
|                                     | 2016-10-10 | $-63.66 \pm 1.06$            | 0.992 | 5.94              |
|                                     | 2016-11-30 | $-63.15 \pm 0.58$            | 0.995 | 8.89              |
|                                     | 2016-11-30 | $-63.11 \pm 0.97$            | 0.993 | 5.91              |
|                                     | 2016-11-30 | $-63.46 \pm 0.74$            | 0.993 | 6.60              |
|                                     | 2016-12-19 | $-61.99 \pm 3.25$            | 0.932 | 3.38              |
|                                     | 2016-12-19 | $-62.11 \pm 1.33$            | 0.984 | 4.86              |
|                                     | 2017-02-22 | $-67.43 \pm 1.26$            | 0.995 | 6.00              |
|                                     | 2017-02-22 | $-63.58 \pm 0.84$            | 0.987 | 5.58              |
|                                     | 2017-02-22 | $-60.85 \pm 0.95$            | 0.981 | 4.81              |
|                                     | 2017-02-22 | $-61.12 \pm 1.63$            | 0.965 | 5.51              |
| <b>dairy farm</b>                   |            |                              |       |                   |
| Weinheim (on farm)                  | 2016-10-26 | $-64.92 \pm 0.71$            | 0.994 | 8.52              |
|                                     | 2016-10-26 | $-62.62 \pm 0.52$            | 0.996 | 8.87              |
| Weinheim (plume with biogas plant)  | 2016-11-21 | $-65.99 \pm 0.98$            | 0.950 | 8.35              |
|                                     | 2016-09-29 | $-62.58 \pm 2.08$            | 0.936 | 3.92              |
|                                     | 2016-09-29 | $-60.16 \pm 2.09$            | 0.970 | 4.24              |
|                                     | 2016-09-29 | $-59.59 \pm 1.59$            | 0.965 | 4.63              |
|                                     | 2016-10-26 | $-56.58 \pm 1.20$            | 0.972 | 5.39              |
|                                     | 2016-10-26 | $-59.66 \pm 0.14$            | 0.999 | 13.09             |
|                                     | 2016-11-21 | $-60.43 \pm 0.85$            | 0.990 | 6.25              |
|                                     | 2016-12-14 | $-47.17 \pm 0.25$            | 0.998 | 13.14             |
|                                     | 2016-12-14 | $-43.13 \pm 1.15$            | 0.986 | 6.84              |
|                                     | 2017-02-23 | $-47.18 \pm 2.82$            | 0.950 | 3.95              |
|                                     | 2017-02-23 | $-43.64 \pm 1.55$            | 0.988 | 5.73              |
| Ladenburg (on farm)                 | 2016-10-26 | $-64.00 \pm 2.63$            | 0.981 | 4.70              |
|                                     | 2016-10-26 | $-61.56 \pm 2.51$            | 0.955 | 4.11              |
|                                     | 2016-10-26 | $-63.93 \pm 0.88$            | 0.990 | 7.32              |
| Ladenburg (plume with biogas plant) | 2016-11-30 | $-40.30 \pm 0.42$            | 0.986 | 8.17              |
|                                     | 2016-11-30 | $-40.36 \pm 0.59$            | 0.974 | 7.68              |
|                                     | 2016-11-30 | $-41.77 \pm 0.93$            | 0.968 | 7.68              |
|                                     | 2016-11-30 | $-55.08 \pm 1.48$            | 0.718 | 3.85              |
| Kleve (organic farming)             | 2017-03-24 | $-63.77 \pm 0.42$            | 0.997 | 11.08             |
|                                     | 2017-03-24 | $-65.11 \pm 1.75$            | 0.979 | 4.88              |
| Kleve (conventional farming)        | 2017-03-24 | $-65.37 \pm 0.42$            | 0.998 | 11.21             |
|                                     | 2017-03-24 | $-63.30 \pm 0.18$            | 0.998 | 13.57             |
| Kleve (plume)                       | 2017-03-24 | $-61.65 \pm 1.67$            | 0.976 | 4.74              |

**Table S1.**  $\delta^{13}\text{CH}_4$  signatures determined for each AirCore measurement.

| location                         | date       | $\delta^{13}\text{CH}_4$ [‰] | $r^2$ | max $\text{CH}_4$ |
|----------------------------------|------------|------------------------------|-------|-------------------|
| <b>landfill</b>                  |            |                              |       |                   |
| Sinsheim (plume)                 | 2016-08-29 | $-54.16 \pm 4.45$            | 0.470 | 2.44              |
|                                  | 2016-09-08 | $-62.19 \pm 4.36$            | 0.582 | 2.60              |
|                                  | 2016-11-02 | $-59.56 \pm 4.99$            | 0.498 | 2.47              |
|                                  | 2016-11-30 | $-58.96 \pm 4.63$            | 0.523 | 2.57              |
| Sinsheim (on landfill)           | 2017-07-18 | $-59.12 \pm 1.14$            | 0.992 | 7.21              |
|                                  | 2017-07-18 | $-59.87 \pm 2.80$            | 0.947 | 3.91              |
|                                  | 2016-07-25 | $-64.86 \pm 0.97$            | 0.987 | 6.05              |
|                                  | 2016-07-25 | $-67.68 \pm 2.86$            | 0.914 | 3.16              |
|                                  | 2016-07-25 | $-69.30 \pm 2.99$            | 0.850 | 3.15              |
|                                  | 2016-07-25 | $-63.99 \pm 4.64$            | 0.606 | 2.56              |
|                                  |            |                              |       |                   |
| <b>WWTP</b>                      |            |                              |       |                   |
| Heidelberg                       | 2016-10-10 | $-50.80 \pm 2.28$            | 0.935 | 3.70              |
|                                  | 2016-10-26 | $-51.17 \pm 3.97$            | 0.823 | 3.50              |
|                                  | 2016-10-26 | $-56.34 \pm 1.20$            | 0.988 | 6.00              |
|                                  | 2016-12-14 | $-51.97 \pm 1.41$            | 0.977 | 5.68              |
|                                  | 2016-12-19 | $-54.21 \pm 2.31$            | 0.960 | 3.96              |
|                                  | 2017-02-22 | $-54.22 \pm 2.41$            | 0.930 | 4.07              |
|                                  | 2017-02-22 | $-49.40 \pm 2.78$            | 0.837 | 3.95              |
|                                  |            |                              |       |                   |
| <b>natural gas facilities</b>    |            |                              |       |                   |
| Sandhausen                       | 2016-11-02 | $-42.14 \pm 0.59$            | 0.994 | 9.99              |
|                                  | 2016-11-02 | $-41.50 \pm 1.00$            | 0.967 | 5.01              |
|                                  | 2017-03-09 | $-49.16 \pm 4.58$            | 0.810 | 2.95              |
| Hähnlein/Gernsheim               | 2016-09-29 | $-41.14 \pm 1.40$            | 0.980 | 4.86              |
|                                  | 2016-10-26 | $-57.45 \pm 2.69$            | 0.922 | 3.39              |
|                                  | 2016-11-21 | $-51.04 \pm 4.00$            | 0.841 | 3.66              |
|                                  | 2016-11-21 | $-47.60 \pm 3.67$            | 0.938 | 4.12              |
|                                  | 2016-11-21 | $-44.49 \pm 1.69$            | 0.957 | 5.26              |
|                                  | 2016-11-21 | $-47.35 \pm 2.95$            | 0.894 | 4.40              |
|                                  | 2016-11-21 | $-51.00 \pm 1.03$            | 0.994 | 8.25              |
|                                  | 2016-12-14 | $-45.11 \pm 1.70$            | 0.973 | 5.53              |
|                                  | 2017-02-23 | $-41.11 \pm 3.08$            | 0.851 | 3.32              |
| <b>bituminous deep coal mine</b> |            |                              |       |                   |
| Bottrop (active)                 | 2017-03-25 | $-59.53 \pm 2.18$            | 0.947 | 3.37              |
|                                  | 2017-03-25 | $-54.73 \pm 2.28$            | 0.928 | 3.61              |
|                                  | 2017-03-25 | $-55.04 \pm 1.25$            | 0.972 | 4.28              |
|                                  | 2017-03-25 | $-54.86 \pm 0.51$            | 0.996 | 7.60              |
| Bottrop (closed)                 | 2017-03-25 | $-49.97 \pm 6.33$            | 0.677 | 2.59              |
